# Supplementary material
Source: PubMed Central journal article supplement (PMC4988215)
Supplement: AEM.00916-16_zam999117357so1.pdf [file AEM.00916-16_zam999117357so1.pdf]

## Shotgun metagenomic profiles have a high capacity to discriminate activated sludge treatment plants according to wastewater type

Federico M. Ibarbalz<sup>1</sup>, Esteban Orellana<sup>1</sup>, Eva L.M. Figuerola<sup>1,2</sup> and Leonardo Erijman<sup>1,2\*</sup>

<sup>1</sup>Instituto de Investigaciones en Ingeniería Genética y Biología Molecular (INGEBI-CONICET).  
Buenos Aires, Argentina

<sup>2</sup>Departamento de Fisiología, Biología Molecular y Celular, Facultad de Ciencias Exactas y Naturales. Universidad de Buenos Aires. Buenos Aires, Argentina

### Supplementary information

**Table S1.** Main features of the wastewater treatment plants analyzed in this work.

| Label | Location                | Sampling Date | Wastewater type                             | Scale      | Configuration  | Population served (or PE) |
|-------|-------------------------|---------------|---------------------------------------------|------------|----------------|---------------------------|
| P1-a  | Buenos Aires, Argentina | May-2009      | Petrochemical (Petroleum Refinery)          | Full-scale | Anoxic/Aerobic | 15,000 (PE)               |
| P1-b  |                         | May-2011      |                                             |            |                |                           |
| P2-a  | Buenos Aires, Argentina | Sep-2008      | Petrochemical (Acrylic Polymer Synthesis)   | Full-scale | Aerobic        | 450 (PE)                  |
| P2-a  |                         | May-2009      |                                             |            |                |                           |
| T-a   | Buenos Aires, Argentina | Sep-2008      | Textile Dyeing                              | Full-scale | Aerobic        | 25,000 (PE)               |
| T-b   |                         | Jun-2011      |                                             |            |                |                           |
| W-a   | Córdoba, Argentina      | May-2010      | Whey filtering                              | Full-scale | Aerobic        | 45,000 (PE)               |
| W-b   |                         | Jun-2011      |                                             |            |                |                           |
| S1-a  | Buenos Aires, Argentina | Nov-2008      | Municipal                                   | Full-scale | Aerobic        | 3,500                     |
| S1-b  |                         | Apr-2013      |                                             |            |                |                           |
| S2-a  | Buenos Aires, Argentina | Oct-2012      | Municipal                                   | Full-scale | Aerobic        | 270,000                   |
| S2-b  |                         | Aug-2013      |                                             |            |                |                           |
| P3-a  | Gujarat, Western India  | Oct-2013      | Petrochemical (Petroleum Refinery Low TDS)  | Full-scale | NA             | NA                        |
| P3-b  |                         | Feb-2014      |                                             |            |                |                           |
| P4-a  | Gujarat, Western India  | Oct-2013      | Petrochemical (Petroleum Refinery High TDS) | Full-scale | NA             | NA                        |
| P4-b  |                         | Feb-2014      |                                             |            |                |                           |
| S3    | Dachang, China          | Jul-2012      | Municipal                                   | Full-scale | NA             | NA                        |
| S4    | Wuxi, China             | Aug-2013      | Municipal                                   | Full-scale | NA             | NA                        |
| S5    | Zhengzhou, China        | Nov-2012      | Municipal                                   | Full-scale | NA             | NA                        |
| S6    | Stanley, Hong Kong      | Feb-2011      | Municipal                                   | Full-scale | Anoxic/Aerobic | 28,000                    |

NA: Not available

**Table S2.** Main operational parameters of the wastewater treatment plants analyzed in this work.

| Label | ABV (m <sup>3</sup> ) | Avg DO (mg/l) | Effluent pH | MLSS (mg/l) | Temp. (°C) | Influent COD (mg/l) | OLR (kg BOD <sub>5</sub> /m <sup>3</sup> d) | Effluent COD (mg/l) | Effluent BOD <sub>5</sub> (mg/l) | Effluent NO <sub>3</sub> <sup>-</sup> (mg/l) | SRT (d) | Protein (mg/L) | CHO (mg/L) | VFA (eq/m <sup>3</sup> ) |
|-------|-----------------------|---------------|-------------|-------------|------------|---------------------|---------------------------------------------|---------------------|----------------------------------|----------------------------------------------|---------|----------------|------------|--------------------------|
| P1-a  | 5,430                 | 1.9           | 7.1-7.6     | 4,850       | 32-37      | 516-837             | 0.44                                        | 58-120              | 37-49                            | 48-68                                        | 86      | <10            | 2          | 0.56                     |
| P1-b  |                       | 3.9           | 7.1-7.7     | 4,425       | 33-37      | 674-901             | 0.51                                        | 73-134              | 25-41                            | 61-70                                        | 69      |                |            |                          |
| P2-a  | 200                   | 8.1           | 7.0-7.4     | 4,350       | 24-27      | 439-920             | 0.07                                        | 47-88               | 17-34                            | 33-46                                        | 70      | NA             | NA         | NA                       |
| P2-b  |                       | 8.6           | 7.0-7.5     | 3,313       | 22-26      | 475-526             | 0.06                                        | 34-71               | 10-28                            | 41-64                                        | 53      |                |            |                          |
| T-a   | 3,500                 | 0.7           | 8.0-8.8     | 3,594       | 26-33      | 685-922             | 0.33                                        | 59-104              | 10-33                            | < 1                                          | 68      | 10             | 25         | 0.12                     |
| T-b   |                       | 0.6           | 8.0-8.9     | 6,563       | 26-30      | 515-593             | 0.29                                        | 38-121              | 12-31                            | < 1                                          | 40      |                |            |                          |
| W-a   | 5,000                 | 0.9           | 7.2-7.7     | 8,163       | 24-28      | 3,545-5,030         | 0.6                                         | 32-80               | 15-29                            | 37-61                                        | 28      | 160            | 75         | 28.0                     |
| W-b   |                       | 0.8           | 7.2-7.8     | 6,531       | 22-28      | 2,598-3,883         | 0.63                                        | 21-112              | 8-34                             | 44-56                                        | 33      |                |            |                          |
| S1-a  | 200                   | 3.4           | 7.1-7.5     | 4,469       | 17-24      | 463-738             | 0.41                                        | 54-66               | 18-29                            | NA                                           | 18      | 20             | 6          | 0.16                     |
| S1-b  |                       | 3.1           | 7.1-7.5     | 5,002       | 17-22      | 142-546             | 0.38                                        | 37-58               | 15-25                            | NA                                           | 23      |                |            |                          |
| S2-a  | 13,400                | NA            | 7.0-7.6     | 2,110       | 18-23      | 212-284             | 1.37                                        | 33-78               | 12-24                            | 9-18                                         | 7       | 10             | 8          | 0.12                     |
| S2-b  |                       | 3.2           | 7.0-7.6     | 2,445       | 16-20      | 212-284             | 1.59                                        | 41-84               | 11-26                            | NA                                           | 7       |                |            |                          |
| P3-a  | NA                    | 2.5           | 6.5-7.0     | 3,000       | NA         | NA                  | NA                                          | NA                  | NA                               | NA                                           | NA      | NA             | NA         | NA                       |
| P3-b  | NA                    | 2.5           | 6.5-7.0     | 3,000       | NA         | NA                  | NA                                          | NA                  | NA                               | NA                                           | NA      |                |            |                          |
| P4-a  | NA                    | 2.9           | 7.7-8.0     | 4,000       | NA         | NA                  | NA                                          | NA                  | NA                               | NA                                           | NA      | NA             | NA         | NA                       |
| P4-b  | NA                    | 2.9           | 7.7-8.0     | 4,000       | NA         | NA                  | NA                                          | NA                  | NA                               | NA                                           | NA      |                |            |                          |
| S3    | NA                    | NA            | NA          | NA          | NA         | NA                  | NA                                          | NA                  | NA                               | NA                                           | NA      | NA             | NA         | NA                       |
| S4    | NA                    | NA            | NA          | NA          | NA         | NA                  | NA                                          | NA                  | NA                               | NA                                           | NA      | NA             | NA         | NA                       |
| S5    | NA                    | NA            | NA          | NA          | NA         | NA                  | NA                                          | NA                  | NA                               | NA                                           | NA      | NA             | NA         | NA                       |
| S6    | 2,716                 | NA            | 6.6-7.0     | 2,500       | 24-32      | 196-481             | 0.62                                        | NA                  | NA                               | NA                                           | NA      | NA             | NA         | NA                       |

ABV: Aeration basin volume

DO: Dissolved oxygen

MLSS: Mixed liquor suspended solids

COD: Chemical oxygen demand

OLR: Organic loading rate

SRT: Solids retention time

CHO: Carbohydrates

VFA: Volatile fatty acids

**Table S3.** Extraction method, summary of sequencing output and database accession numbers. Technical replicates were averaged.

| Label | DNA extraction            | Sequencing technology | Number of reads | High-quality reads <sup>1</sup> | Protein coding regions <sup>1</sup> | MG-RAST ID              | NCBI-SRA ID               |
|-------|---------------------------|-----------------------|-----------------|---------------------------------|-------------------------------------|-------------------------|---------------------------|
| P1-a  | FastDNA Spin Kit for Soil | Illumina HiSeq1500    | 1.51E+07        | 1.30E+07 (86.6)                 | 6.73E+06 (51.4)                     | 4603523.3;<br>4603525.3 | SRR2107128;<br>SRR2107133 |
| P1-b  | FastDNA Spin Kit for Soil | Illumina HiSeq1500    | 1.23E+07        | 1.05E+07 (85.7)                 | 5.03E+06 (47.8)                     | 4603527.3;<br>4603529.3 | SRR2107174;<br>SRR2107175 |
| P2-a  | FastDNA Spin Kit for Soil | Illumina HiSeq1500    | 1.37E+07        | 1.20E+07 (87.5)                 | 6.90E+06 (57.1)                     | 4603531.3;<br>4603533.3 | SRR2107171;<br>SRR2107173 |
| P2-a  | FastDNA Spin Kit for Soil | Illumina HiSeq1500    | 1.35E+07        | 1.18E+07 (87.2)                 | 6.71E+06 (56.9)                     | 4603535.3;<br>4603537.3 | SRR2107176;<br>SRR2107177 |
| T-a   | FastDNA Spin Kit for Soil | Illumina HiSeq1500    | 1.05E+07        | 9.10E+06 (87.0)                 | 4.83E+06 (53.0)                     | 4603539.3;<br>4603541.3 | SRR2107178;<br>SRR2107179 |
| T-b   | FastDNA Spin Kit for Soil | Illumina HiSeq1500    | 1.25E+07        | 1.09E+07 (87.5)                 | 6.66E+06 (60.5)                     | 4603543.3;<br>4603545.3 | SRR2107180;<br>SRR2107181 |
| W-a   | FastDNA Spin Kit for Soil | Illumina HiSeq1500    | 1.56E+07        | 1.39E+07 (89.3)                 | 8.44E+06 (60.5)                     | 4603547.3;<br>4603549.3 | SRR2107182;<br>SRR2107183 |
| W-b   | FastDNA Spin Kit for Soil | Illumina HiSeq1500    | 1.25E+07        | 1.09E+07 (87.8)                 | 5.66E+06 (51.6)                     | 4603551.3;<br>4603553.3 | SRR2107184;<br>SRR2107185 |
| S1-a  | FastDNA Spin Kit for Soil | Illumina HiSeq1500    | 1.33E+07        | 1.23E+07 (92.3)                 | 9.47E+06 (76.8)                     | 4603555.3;<br>4603557.3 | SRR2107210;<br>SRR2107211 |
| S1-b  | FastDNA Spin Kit for Soil | Illumina HiSeq1500    | 1.07E+07        | 9.81E+06 (92.1)                 | 7.34E+06 (74.9)                     | 4603559.3;<br>4603561.3 | SRR2107212;<br>SRR2107213 |
| S2-a  | FastDNA Spin Kit for Soil | Illumina HiSeq1500    | 1.51E+07        | 1.39E+07 (92.1)                 | 9.52E+06 (68.6)                     | 4603563.3;<br>4603565.3 | SRR2107215;<br>SRR2107216 |
| S2-b  | FastDNA Spin Kit for Soil | Illumina HiSeq1500    | 1.51E+07        | 1.40E+07 (93.3)                 | 9.01E+06 (64.2)                     | 4603567.3;<br>4603569.3 | SRR2107218;<br>SRR2107219 |
| P3-a  | FastDNA Spin Kit for Soil | Illumina NextSeq500   | 4.42E+06        | 4.08E+06 (92.2)                 | 3.09E+06 (75.8)                     | 4660921.3               | SRR1702225                |
| P3-b  | FastDNA Spin Kit for Soil | Illumina NextSeq500   | 4.42E+06        | 4.60E+06 (91.6)                 | 3.67E+06 (79.8)                     | 4636805.3               | SRR1702234                |
| P4-a  | FastDNA Spin Kit for Soil | Illumina NextSeq500   | 5.28E+06        | 4.81E+06 (91.0)                 | 3.15E+06 (65.6)                     | 4660920.3               | SRR1702232                |
| P4-b  | FastDNA Spin Kit for Soil | Illumina NextSeq500   | 5.28E+06        | 3.98E+06 (92.2)                 | 3.30E+06 (82.9)                     | 4636804.3               | SRR1702233                |
| S3    | NA                        | Illumina HiSeq2000    | 1.25E+07        | 1.11E+07 (89.4)                 | 9.26E+06 (83.1)                     | 4629717.3               | SRR1106701                |
| S4    | NA                        | Illumina HiSeq2000    | 1.21E+07        | 1.07E+07 (88.3)                 | 8.43E+06 (78.6)                     | 4629718.3               | SRR1106709                |
| S5    | NA                        | Illumina HiSeq2000    | 6.78E+06        | 6.62E+06 (97.6)                 | 5.70E+06 (86.1)                     | 4660919.3               | SRR1106873                |
| S6    | FastDNA Spin Kit for Soil | Illumina HiSeq2000    | 1.67E+07        | 1.57E+07 (93.9)                 | 1.13E+07 (72.1)                     | 4629725.3               | SRR609293                 |

<sup>1</sup>In brackets, percentage relative to previous column.

**Table S4.** Spearman's rank correlation coefficients for multiple pairwise correlations between 11 highly-represented phyla, utilizing GC content values in all WWTPs (n = 12). Values  $\rho > 0.56$  and  $\rho \leq 0.05$  were highlighted. Phyla names were shortened. Actb: *Actinobacteria*; Prtb: *Proteobacteria*; Bctr: *Bacteroidetes*; Plct: *Planctomycetes*; Acdb: *Acidobacteria*; Vrcm: *Verrucomicrobia*; Clfx: *Chloroflexi*; Ntrp: *Nitrospirae*; Clrb: *Chlorobi*; Euch: *Euryarchaeota*; DcTh: *Deinococcus-Thermus*.

|       | Actb. | Prtb.       | Bctr.       | Plct.       | Acdb.       | Vrcm.       | Clfx.       | Ntrp.       | Clrb.       | Euch.       | DcTh        |
|-------|-------|-------------|-------------|-------------|-------------|-------------|-------------|-------------|-------------|-------------|-------------|
| Actb. | -     | 0.31        | 0.05        | 0.24        | 0           | 0.05        | 0.29        | 0.38        | 0.2         | 0.29        | 0.39        |
| Prtb. | 0.31  | -           | 0.41        | <b>0.65</b> | 0.14        | 0.45        | 0.33        | <b>0.72</b> | 0.13        | <b>0.74</b> | <b>0.73</b> |
| Bctr. | 0.05  | 0.41        | -           | 0.46        | 0.35        | <b>0.68</b> | <b>0.58</b> | 0.13        | 0.48        | 0.55        | 0.4         |
| Plct. | 0.24  | <b>0.65</b> | 0.46        | -           | <b>0.7</b>  | <b>0.78</b> | <b>0.81</b> | <b>0.63</b> | <b>0.66</b> | <b>0.74</b> | <b>0.87</b> |
| Acdb. | 0     | 0.14        | 0.35        | <b>0.7</b>  | -           | <b>0.85</b> | <b>0.76</b> | 0.35        | <b>0.93</b> | 0.45        | 0.37        |
| Vrcm. | 0.05  | 0.45        | <b>0.68</b> | <b>0.78</b> | <b>0.85</b> | -           | <b>0.87</b> | 0.41        | <b>0.84</b> | <b>0.71</b> | 0.56        |
| Clfx. | 0.29  | 0.33        | <b>0.58</b> | <b>0.81</b> | <b>0.76</b> | <b>0.87</b> | -           | 0.26        | <b>0.8</b>  | <b>0.6</b>  | <b>0.64</b> |
| Ntrp. | 0.38  | <b>0.72</b> | 0.13        | <b>0.63</b> | 0.35        | 0.41        | 0.26        | -           | 0.28        | <b>0.7</b>  | <b>0.66</b> |
| Clrb. | 0.2   | 0.13        | 0.48        | <b>0.66</b> | <b>0.93</b> | <b>0.84</b> | <b>0.8</b>  | 0.28        | -           | 0.46        | 0.38        |
| Euch. | 0.29  | <b>0.74</b> | 0.55        | <b>0.74</b> | 0.45        | <b>0.71</b> | <b>0.6</b>  | <b>0.7</b>  | 0.46        | -           | <b>0.62</b> |
| DcTh  | 0.39  | <b>0.73</b> | 0.4         | <b>0.87</b> | 0.37        | 0.56        | <b>0.64</b> | <b>0.66</b> | 0.38        | <b>0.62</b> | -           |

**Table S5:** Correspondence Analysis (CA) and Principal Components Analysis (PCA) based on SEED subsystems (level 3), in order to retrieve the most relevant drivers of both ordinations.

| <b>Relative loading, CA1 (37 %)<sup>1</sup></b>  | <b>Subsystem</b>                                         |
|--------------------------------------------------|----------------------------------------------------------|
| 1.000                                            | Petrobactin-mediated iron uptake system                  |
| 0.802                                            | D-allose utilization                                     |
| 0.796                                            | Siderophore [Alcaligin-like]                             |
| 0.768                                            | Betaine biosynthesis from glycine                        |
| 0.763                                            | Siderophore Enterobactin                                 |
| 0.743                                            | <i>Salmonella</i> invasion locus                         |
| 0.726                                            | Energy-conserving hydrogenase (ferredoxin) Ech           |
| 0.660                                            | Membrane bound hydrogenases                              |
| 0.655                                            | Archaeal membrane bound hydrogenases                     |
| 0.648                                            | (GlcNAc) <sub>2</sub> Catabolic Operon                   |
| -1.000                                           | alpha-Fimbriae                                           |
| -0.849                                           | <i>Streptococcus agalactiae</i> hemolysin operon         |
| -0.849                                           | Phage Ea cluster                                         |
| -0.817                                           | Archease                                                 |
| -0.764                                           | Lysozyme inhibitors                                      |
| -0.741                                           | PFGI-1-like cluster 2                                    |
| -0.734                                           | PFGI-1-like cluster 1                                    |
| -0.680                                           | Acetophenone carboxylase 1                               |
| -0.644                                           | Biofilm Adhesin Biosynthesis                             |
| -0.637                                           | Predicted mycobacterial monooxygenase                    |
| <b>Relative loading, PCA1 (52 %)<sup>1</sup></b> | <b>Subsystem</b>                                         |
| 1.000                                            | Sugar utilization in Thermotogales                       |
| 0.349                                            | COG3533                                                  |
| 0.332                                            | Universal GTPases                                        |
| 0.267                                            | Maltose and Maltodextrin Utilization                     |
| 0.264                                            | Lactose and Galactose Uptake and Utilization             |
| 0.255                                            | D-Galacturonate and D-Glucuronate Utilization            |
| 0.254                                            | TCA Cycle                                                |
| 0.216                                            | Translation elongation factors bacterial                 |
| 0.212                                            | Galactosylceramide and Sulfatide metabolism              |
| 0.212                                            | DNA-replication                                          |
| -1.000                                           | Fatty acid degradation regulons                          |
| -0.852                                           | Fatty acid metabolism cluster                            |
| -0.849                                           | n-Phenylalkanoic acid degradation                        |
| -0.767                                           | Acetyl-CoA fermentation to Butyrate                      |
| -0.704                                           | Polyhydroxybutyrate metabolism                           |
| -0.670                                           | Isoleucine degradation                                   |
| -0.653                                           | ABC transporter branched-chain amino acid (TC 3.A.1.4.1) |
| -0.568                                           | Biotin biosynthesis                                      |
| -0.549                                           | Butanol Biosynthesis                                     |
| -0.495                                           | Flagellum                                                |

1: In brackets, proportion of variance explained by main axis.

**Table S6.** Permutation test to evaluate relevant process variables in their fit to a PCA ordination based on SEED subsystems (level 1). P-values are based on 1000 permutations.

| VECTORS |         |         |                |       |
|---------|---------|---------|----------------|-------|
|         | PC1     | PC2     | r <sup>2</sup> | p     |
| DO      | -0.9137 | 0.4063  | 0.8153         | 0.002 |
| pH      | 0.9872  | -0.1594 | 0.4200         | 0.080 |
| MLSS    | 0.9002  | 0.4356  | 0.4300         | 0.075 |
| T       | -0.6226 | -0.7825 | 0.1171         | 0.562 |
| SRT     | -0.9046 | 0.4264  | 0.2095         | 0.347 |

| FACTORS   |         |         |
|-----------|---------|---------|
| Centroids | PC1     | PC2     |
| P1        | -0.6243 | -0.3024 |
| P2        | -0.8605 | 0.8515  |
| S1        | 0.0774  | -0.6336 |
| S2        | -0.1050 | -0.3760 |
| T         | 0.5903  | -0.3235 |
| W         | 0.9221  | 0.7841  |

| Goodness of fit |                |       |
|-----------------|----------------|-------|
|                 | r <sup>2</sup> | p     |
| Site            | 0.9384         | 0.001 |

**Table S7:** Assembly statistics for recovered genomic sequences, obtained from activated sludge by differential coverage binning of two temporally replicated metagenomes. The score refers to the bi-directional best-hit classification.

| ID    | Size (bp) | Number of scaffolds | Mean scaffold length (bp) | Maximum scaffold length (bp) | GC (%) | Number of essential genes | Nr. of unique essential genes | Relative abundance (%) | Assembled scaffolds <sup>1</sup> | Bi-directional best hit classification    | Score |
|-------|-----------|---------------------|---------------------------|------------------------------|--------|---------------------------|-------------------------------|------------------------|----------------------------------|-------------------------------------------|-------|
| P1GA1 | 3.56E+06  | 93                  | 3.83E+04                  | 1.84E+05                     | 72.7   | 78                        | 77                            | 2.0                    | a                                | <i>Leptothrix cholodni</i>                | 507   |
|       |           |                     |                           |                              |        |                           |                               |                        |                                  | <i>Methylibium petroleiphilum</i> PM1     | 495   |
| P1GB1 | 2.31E+06  | 455                 | 5.08E+03                  | 5.73E+04                     | 69.2   | 95                        | 93                            | 0.8                    | a                                | <i>Nitrosococcus watsoni</i>              | 504   |
|       |           |                     |                           |                              |        |                           |                               |                        |                                  | <i>Alkalilimnicola ehrlichii</i> MLHE-1   | 487   |
| P1GC1 | 3.82E+06  | 382                 | 1.00E+04                  | 9.47E+04                     | 66.6   | 102                       | 100                           | 2.2                    | a                                | <i>Herpetosiphon aurantiacus</i>          | 513   |
|       |           |                     |                           |                              |        |                           |                               |                        |                                  | <i>Roseiflexus</i> sp. RS-1               | 409   |
| P1GE1 | 3.06E+06  | 372                 | 8.21E+03                  | 8.99E+04                     | 60.5   | 96                        | 90                            | 1.6                    | a                                | <i>Anaerolinea thermophila</i>            | 534   |
| P1GG1 | 2.83E+06  | 20                  | 1.42E+05                  | 7.88E+05                     | 57.3   | 97                        | 94                            | 3.6                    | a                                | <i>Desulfuromonas</i> sp.                 | 545   |
| P1GI1 | 2.15E+06  | 220                 | 9.79E+03                  | 1.39E+05                     | 65.6   | 85                        | 84                            | 3.3                    | a                                | <i>Alkalilimnicola ehrlichii</i>          | 521   |
|       |           |                     |                           |                              |        |                           |                               |                        |                                  | <i>Methylococcus capsulatus</i> str. Bath | 493   |
| P1GK1 | 3.31E+06  | 193                 | 1.72E+04                  | 8.93E+04                     | 69.5   | 86                        | 84                            | 2.5                    | a                                | <i>Polaromonas naphthalenivorans</i>      | 526   |
|       |           |                     |                           |                              |        |                           |                               |                        |                                  | <i>Alicyclophilus denitrificans</i>       | 505   |
| P1GL1 | 2.31E+06  | 53                  | 43617.6                   | 3.56E+05                     | 65.6   | 89                        | 87                            | 1.1                    | a                                | <i>Thiobacillus denitrificans</i>         | 522   |
| P1GL2 | 4.32E+06  | 46                  | 93855.0                   | 6.07E+05                     | 68.2   | 85                        | 85                            | 2.2                    | a                                | <i>Thioalkalivibrio</i> sp.               | 540   |
| P1GL3 | 3.65E+06  | 44                  | 83064.4                   | 7.95E+05                     | 62.8   | 110                       | 105                           | 2.1                    | a                                | <i>Hyphomicrobium denitrificans</i>       | 534   |
| P1GL4 | 2.60E+06  | 141                 | 2.32E+04                  | 2.28E+05                     | 68.3   | 88                        | 85                            | 1.5                    | a                                | <i>Azoarcus</i> sp.                       | 525   |
|       |           |                     |                           |                              |        |                           |                               |                        |                                  | <i>Aromatoleum aromaticum</i>             | 513   |
|       |           |                     |                           |                              |        |                           |                               |                        |                                  | <i>Sideroxydans lithotrophicus</i>        | 496   |
|       |           |                     |                           |                              |        |                           |                               |                        |                                  | <i>Ignavibacterium album</i>              | 548   |
| P1GP1 | 3.39E+06  | 34                  | 9.98E+04                  | 3.56E+05                     | 33.4   | 104                       | 103                           | 4.9                    | a                                | <i>Mycobacterium vanbaaleni</i>           | 541   |
| P1GQ1 | 5.63E+06  | 165                 | 3.41E+04                  | 2.07E+05                     | 68.0   | 99                        | 96                            | 2.4                    | b                                | <i>Solibacter usitatus</i>                | 533   |
| P2GA1 | 3.37E+06  | 50                  | 6.74E+04                  | 3.13E+05                     | 54.0   | 105                       | 101                           | 7.0                    | a                                | <i>Acidobacterium</i> sp.                 | 523   |
|       |           |                     |                           |                              |        |                           |                               |                        |                                  | <i>Methylibium petroleiphilum</i>         | 513   |
| P2GC1 | 3.94E+06  | 56                  | 7.03E+04                  | 3.34E+05                     | 69.1   | 92                        | 90                            | 4.8                    | a                                | <i>Leptothrix cholodni</i>                | 463   |
|       |           |                     |                           |                              |        |                           |                               |                        |                                  | <i>Methylobacterium nodulans</i>          | 520   |
| P2GD1 | 4.55E+06  | 161                 | 2.83E+04                  | 7.58E+05                     | 66.3   | 109                       | 104                           | 4.2                    | a                                | <i>Acidovorax</i> sp.                     | 525   |
| P2GE1 | 4.12E+06  | 119                 | 3.46E+04                  | 1.43E+05                     | 65.9   | 105                       | 104                           | 3.0                    | a                                | <i>Alicyclophilus denitrificans</i> BC    | 490   |
|       |           |                     |                           |                              |        |                           |                               |                        |                                  |                                           |       |

<sup>1</sup>The label indicates the sample from which the assembled scaffolds were used to map the metagenomic reads (see Fig. S1).

Table S7: Continued.

| ID    | Size (bp) | Number of scaffolds | Mean scaffold length (bp) | Maximum scaffold length (bp) | GC (%) | Number of essential genes | Nr. of unique essential genes | Relative abundance (%) | Assembled scaffolds <sup>1</sup> | Bi-directional best hit classification                     | Score |
|-------|-----------|---------------------|---------------------------|------------------------------|--------|---------------------------|-------------------------------|------------------------|----------------------------------|------------------------------------------------------------|-------|
| P2GI1 | 3.87E+06  | 54                  | 7.16E+04                  | 3.21E+05                     | 62.0   | 76                        | 75                            | 1.3                    | a                                | <i>Comamonas sp.</i>                                       | 519   |
| P2GJ1 | 3.54E+06  | 79                  | 4.48E+04                  | 3.13E+05                     | 54.0   | 107                       | 103                           | 10.1                   | b                                | <i>Solibacter usitatus</i> Ellin6076                       | 531   |
| P2GK1 | 1.74E+06  | 521                 | 3.33E+03                  | 2.00E+04                     | 65.1   | 82                        | 78                            | 1.9                    | b                                | <i>Clavibacter michiganensis</i> subsp. <i>sepedonicus</i> | 513   |
| P2GL1 | 4.25E+06  | 62                  | 6.85E+04                  | 3.26E+05                     | 69.1   | 108                       | 105                           | 1.8                    | b                                | <i>Methylibium petroleiphilum</i> PM1                      | 520   |
|       |           |                     |                           |                              |        |                           |                               |                        |                                  | <i>Leptothrix cholodni</i> SP-6                            | 506   |
| P2GM1 | 2.70E+06  | 340                 | 7.96E+03                  | 4.49E+04                     | 33.0   | 83                        | 82                            | 1.0                    | b                                | <i>Ignavibacterium album</i> JCM 16511                     | 549   |
| P2GN1 | 2.98E+06  | 415                 | 7.17E+03                  | 6.80E+04                     | 67.7   | 80                        | 76                            | 1.1                    | b                                | <i>Planctomyces limnophilus</i> DSM 3776                   | 534   |
| P2GP1 | 4.99E+06  | 78                  | 6.39E+04                  | 2.88E+05                     | 69.9   | 91                        | 90                            | 2.6                    | b                                | <i>Leptothrix cholodni</i> SP-6                            | 505   |
| P2GQ1 | 6.00E+06  | 64                  | 9.38E+04                  | 3.90E+05                     | 63.8   | 70                        | 69                            | 3.8                    | b                                | <i>Bradyrhizobium sp.</i> BTAi1                            | 520   |
| WGF1  | 3.19E+06  | 378                 | 8.44E+03                  | 7.96E+04                     | 70.0   | 86                        | 75                            | 1.6                    | a                                | <i>Propionibacterium acnes</i>                             | 511   |
| WGG1  | 2.69E+06  | 316                 | 8.52E+03                  | 5.78E+04                     | 38.0   | 85                        | 82                            | 0.7                    | a                                | <i>Flavobacteriales bacterium</i>                          | 502   |
| WGG2  | 2.58E+06  | 599                 | 4.31E+03                  | 4.21E+04                     | 71.8   | 80                        | 79                            | 0.7                    | a                                | <i>Leptothrix cholodni</i>                                 | 513   |
| WGH1  | 7.28E+06  | 530                 | 1.37E+04                  | 8.69E+04                     | 56.2   | 108                       | 104                           | 2.2                    | a                                | <i>Chloroflexus sp.</i>                                    | 530   |
| WGI1  | 3.68E+06  | 235                 | 1.56E+04                  | 1.07E+05                     | 68.3   | 75                        | 74                            | 1.4                    | a                                | <i>Propionibacterium acnes</i>                             | 517   |
| WGL1  | 3.24E+06  | 30                  | 1.08E+05                  | 3.71E+05                     | 64.9   | 92                        | 91                            | 2.4                    | a                                | <i>Paracoccus denitrifican</i>                             | 515   |
| WGM1  | 3.65E+06  | 24                  | 1.52E+05                  | 4.41E+05                     | 39.1   | 104                       | 103                           | 1.5                    | a                                | <i>Ignavibacterium album</i>                               | 515   |
| WGN1  | 3.92E+06  | 328                 | 1.19E+04                  | 1.56E+05                     | 70.6   | 99                        | 94                            | 5.0                    | b                                | <i>Propionibacterium acnes</i>                             | 510   |
| WGO1  | 4.15E+06  | 168                 | 2.47E+04                  | 1.60E+05                     | 69.6   | 106                       | 104                           | 8.9                    | b                                | <i>Dinoroseobacter shibae</i>                              | 500   |
| WGP1  | 3.79E+06  | 56                  | 6.77E+04                  | 2.50E+05                     | 70.0   | 104                       | 97                            | 5.4                    | b                                | <i>Propionibacterium sp.</i>                               | 508   |
| WGQ1  | 5.46E+06  | 75                  | 7.29E+04                  | 2.97E+05                     | 69.7   | 105                       | 104                           | 8.3                    | b                                | <i>Magnetospirillum sp.</i>                                | 516   |
| WGR1  | 3.76E+06  | 219                 | 1.72E+04                  | 8.48E+04                     | 68.9   | 107                       | 104                           | 9.3                    | b                                | <i>Propionibacterium acnes</i>                             | 532   |
| WGS1  | 2.76E+06  | 51                  | 5.41E+04                  | 2.08E+05                     | 36.8   | 96                        | 95                            | 7.4                    | b                                | <i>Pedobacter sp.</i>                                      | 507   |
|       |           |                     |                           |                              |        |                           |                               |                        |                                  | <i>Sphingobacterium spiritivorum</i> ATCC 33300            | 488   |
| TGC1  | 4.27E+06  | 259                 | 1.65E+04                  | 1.06E+05                     | 66.4   | 103                       | 100                           | 3.1                    | a                                | <i>Sphingopyxis alaskensis</i> RB2256                      | 541   |
| TGD1  | 3.31E+06  | 125                 | 2.65E+04                  | 1.72E+05                     | 54.0   | 106                       | 105                           | 3.6                    | a                                | <i>Chitinophaga pinensis</i> DSM 2588                      | 536   |

<sup>1</sup>The label indicates the sample from which the assembled scaffolds were used to map the metagenomic reads (see Fig. S1).



**Table S7: Continued.**

| ID   | Size (bp) | Number of scaffolds | Mean scaffold length (bp) | Maximum scaffold length (bp) | GC (%) | Number of essential genes | Nr. of unique essential genes | Relative abundance (%) | Assembled scaffolds <sup>1</sup> | Bi-directional best hit classification      | Score |
|------|-----------|---------------------|---------------------------|------------------------------|--------|---------------------------|-------------------------------|------------------------|----------------------------------|---------------------------------------------|-------|
| TGE1 | 4.44E+06  | 393                 | 1.13E+04                  | 7.65E+04                     | 48.8   | 100                       | 99                            | 5.4                    | a                                | <i>Spirosoma linguale</i> DSM 74            | 508   |
|      |           |                     |                           |                              |        |                           |                               |                        |                                  | <i>Robiginitalea biformata</i> HTCC2501     | 496   |
|      |           |                     |                           |                              |        |                           |                               |                        |                                  | <i>Chitinophaga pinensis</i> DSM 2588       | 490   |
| TGG1 | 2.77E+06  | 376                 | 7.36E+03                  | 6.27E+04                     | 66.4   | 87                        | 87                            | 1.4                    | a                                | <i>Delftia acidovorans</i> SPH-1            | 523   |
|      |           |                     |                           |                              |        |                           |                               |                        |                                  | <i>Acidovorax</i> sp. JS42                  | 523   |
| TGH1 | 3.21E+06  | 102                 | 3.15E+04                  | 2.07E+05                     | 39.0   | 100                       | 99                            | 1.4                    | a                                | <i>Desulfuromonas</i> sp.                   | 522   |
| TGI1 | 4.16E+06  | 299                 | 1.39E+04                  | 7.01E+04                     | 71.1   | 100                       | 99                            | 4.0                    | a                                | <i>Blastopirellula marina</i> DSM 3645      | 528   |
|      |           |                     |                           |                              |        |                           |                               |                        |                                  | <i>Planctomyces limnophilus</i> DSM 3776    | 488   |
| TGI2 | 3.47E+06  | 139                 | 2.50E+04                  | 1.44E+05                     | 63.6   | 103                       | 103                           | 3.8                    | a                                | <i>Chthoniobacter flavus</i> Ellin428       | 516   |
| TGJ1 | 1.76E+06  | 21                  | 8.40E+04                  | 2.55E+05                     | 40.7   | 103                       | 102                           | 2.6                    | a                                | <i>Geobacter</i> sp. M18                    | 506   |
|      |           |                     |                           |                              |        |                           |                               |                        |                                  | <i>Desulfuromonas</i> sp.                   | 500   |
|      |           |                     |                           |                              |        |                           |                               |                        |                                  | <i>Anaeromyxobacter dehalogenans</i> 2CP-1  | 478   |
| TGK1 | 3.63E+06  | 504                 | 7.21E+03                  | 8.18E+04                     | 59.3   | 102                       | 101                           | 8.2                    | b                                | <i>Opitutus terrae</i> PB90-1               | 540   |
|      |           |                     |                           |                              |        |                           |                               |                        |                                  | <i>Akkermansia muciniphila</i> ATCC BAA-835 | 498   |
|      |           |                     |                           |                              |        |                           |                               |                        |                                  | <i>Chthoniobacter flavus</i> Ellin428       | 490   |
| TGL1 | 5.15E+06  | 99                  | 5.20E+04                  | 3.03E+05                     | 50.0   | 102                       | 101                           | 7.1                    | b                                | <i>Pirellula</i> sp. 1                      | 535   |
|      |           |                     |                           |                              |        |                           |                               |                        |                                  | <i>Rhodopirellula baltica</i> SH 1          | 523   |
|      |           |                     |                           |                              |        |                           |                               |                        |                                  | <i>Blastopirellula marina</i> DSM 3645      | 513   |
| TGM1 | 3.63E+06  | 129                 | 2.81E+04                  | 1.53E+05                     | 64.5   | 100                       | 100                           | 15.3                   | b                                | <i>Chthoniobacter flavus</i> Ellin428       | 506   |
|      |           |                     |                           |                              |        |                           |                               |                        |                                  | <i>Pedosphaera parvula</i> Ellin514         | 455   |
| TGO1 | 3.81E+06  | 33                  | 1.15E+05                  | 3.67E+05                     | 38.3   | 101                       | 98                            | 4.5                    | b                                | <i>Pedobacter</i> sp.                       | 544   |
| TGP1 | 3.13E+06  | 25                  | 1.25E+05                  | 4.14E+05                     | 53.4   | 104                       | 102                           | 9.8                    | b                                | <i>Solibacter usitatus</i> Ellin6076        | 509   |
|      |           |                     |                           |                              |        |                           |                               |                        |                                  | <i>Acidobacterium capsulatum</i> ATCC 51196 | 477   |
| TGQ1 | 2.51E+06  | 680                 | 3.69E+03                  | 3.31E+04                     | 52.6   | 88                        | 86                            | 7.1                    | b                                | <i>Methylacidiphilum infernorum</i> V4      | 507   |
| TGR1 | 3.23E+06  | 609                 | 5.30E+03                  | 3.44E+04                     | 69.8   | 69                        | 66                            | 2.5                    | b                                | <i>Chloroflexus</i> sp.                     | 529   |

<sup>1</sup>The label indicates the sample from which the assembled scaffolds were used to map the metagenomic reads (see Fig. S1).

**Table S7: Continued.**

| ID    | Size (bp) | Number of scaffolds | Mean scaffold length (bp) | Maximum scaffold length (bp) | GC (%) | Number of essential genes | Nr. of unique essential genes | Relative abundance (%) | Assembled scaffolds <sup>1</sup> | Bi-directional best hit classification       | Score |
|-------|-----------|---------------------|---------------------------|------------------------------|--------|---------------------------|-------------------------------|------------------------|----------------------------------|----------------------------------------------|-------|
| S1GB1 | 3.40E+06  | 1567                | 2.17E+03                  | 1.00E+04                     | 69.0   | 85                        | 84                            | 0.8                    | a                                | <i>Acidimicrobium ferrooxidans</i> DSM 10331 | 537   |
| S1GD1 | 2.46E+06  | 416                 | 5.91E+03                  | 6.10E+04                     | 62.2   | 101                       | 99                            | 0.9                    | a                                | <i>Conexibacter woesei</i> DSM 14684         | 533   |
| S1GE1 | 9.84E+05  | 18                  | 5.47E+04                  | 2.39E+05                     | 36.8   | 83                        | 81                            | 0.5                    | a                                | <i>Thermobaculum terrenum</i> ATCC BAA-798   | 516   |
|       |           |                     |                           |                              |        |                           |                               |                        |                                  | <i>Sphaerobacter thermophilus</i> DSM 20745  | 513   |
| S1GG1 | 2.17E+06  | 30                  | 7.24E+04                  | 1.56E+05                     | 38.1   | 82                        | 82                            | 1.4                    | a                                | <i>Pedobacter saltans</i> DSM 12145          | 518   |
| S1GH1 | 4.17E+06  | 807                 | 5.17E+03                  | 3.02E+04                     | 69.3   | 98                        | 97                            | 4.2                    | b                                | <i>Acidimicrobium ferrooxidans</i> DSM 10331 | 528   |
| S1GJ1 | 1.05E+06  | 115                 | 9.11E+03                  | 5.08E+04                     | 35.3   | 69                        | 68                            | 0.6                    | b                                | <i>Chloroflexus aggregans</i> DSM 9485       | 510   |
|       |           |                     |                           |                              |        |                           |                               |                        |                                  | <i>Dictyoglomus thermophilum H-6-12</i>      | 482   |
| S2GB1 | 2.95E+06  | 766                 | 3.85E+03                  | 5.44E+04                     | 41.7   | 80                        | 80                            | 2.0                    | a                                | <i>Chitinophaga pinensis</i> DSM 2588        | 538   |
| S2GE1 | 2.44E+06  | 746                 | 3.28E+03                  | 3.44E+04                     | 69.0   | 71                        | 69                            | 1.1                    | a                                | <i>Janibacter sp.</i> HTCC2649               | 515   |
| S2GF1 | 3.56E+06  | 590                 | 6.03E+03                  | 6.87E+04                     | 42.0   | 85                        | 81                            | 1.4                    | a                                | <i>Pedobacter saltans</i> DSM 12145          | 508   |
| S2GF2 | 1.57E+06  | 279                 | 5.62E+03                  | 2.91E+04                     | 62.2   | 74                        | 70                            | 0.7                    | a                                | <i>Acidovorax sp.</i>                        | 528   |
|       |           |                     |                           |                              |        |                           |                               |                        |                                  | <i>Alicyclophilus denitrificans</i> BC       | 522   |
| S2GG1 | 2.90E+06  | 123                 | 2.36E+04                  | 1.40E+05                     | 58.0   | 103                       | 100                           | 2.2                    | a                                | <i>Sphingopyxis alaskensis</i> RB2256        | 509   |
|       |           |                     |                           |                              |        |                           |                               |                        |                                  | <i>Novosphingobium aromaticivorans</i>       | 472   |
| S2GI1 | 3.88E+06  | 124                 | 3.13E+04                  | 2.39E+05                     | 45.0   | 107                       | 106                           | 5.9                    | a                                | <i>Thioalkalivibrio sp.</i> HL-EbGR7         | 532   |
|       |           |                     |                           |                              |        |                           |                               |                        |                                  | <i>Thiothrix sp.</i>                         | 460   |
| S2GJ1 | 2.89E+06  | 776                 | 3.73E+03                  | 1.81E+04                     | 71.7   | 104                       | 100                           | 0.7                    | a                                | <i>Rhodococcus jostii</i> RHA1               | 504   |
| S2GJ2 | 2.87E+06  | 1236                | 2.32E+03                  | 1.51E+04                     | 47.2   | 76                        | 72                            | 0.6                    | a                                | <i>Pedobacter heparinus</i> DSM 2366         | 523   |
| S2GJ3 | 2.43E+06  | 717                 | 3.39E+03                  | 2.84E+04                     | 58.5   | 106                       | 85                            | 0.5                    | a                                | <i>Kribbella flavida</i> DSM 17836           | 536   |

<sup>1</sup>The label indicates the sample from which the assembled scaffolds were used to map the metagenomic reads (see Fig. S1).

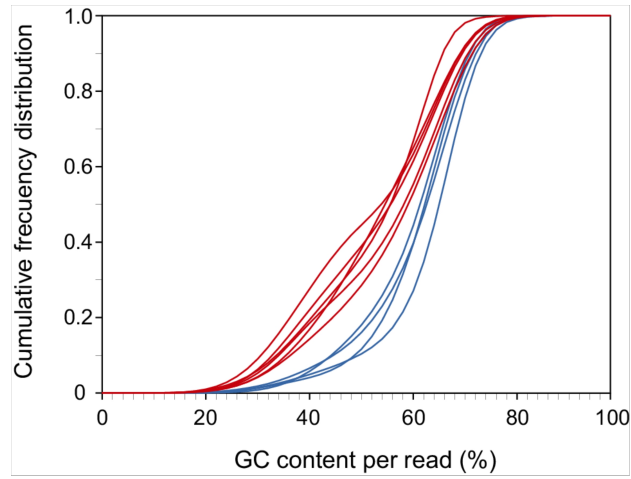

**Figure S1.** Empirical cumulative frequency distribution for GC content per sequence (%) of metagenomic data sets from petrochemical (blue) and municipal (red) WWTPs.

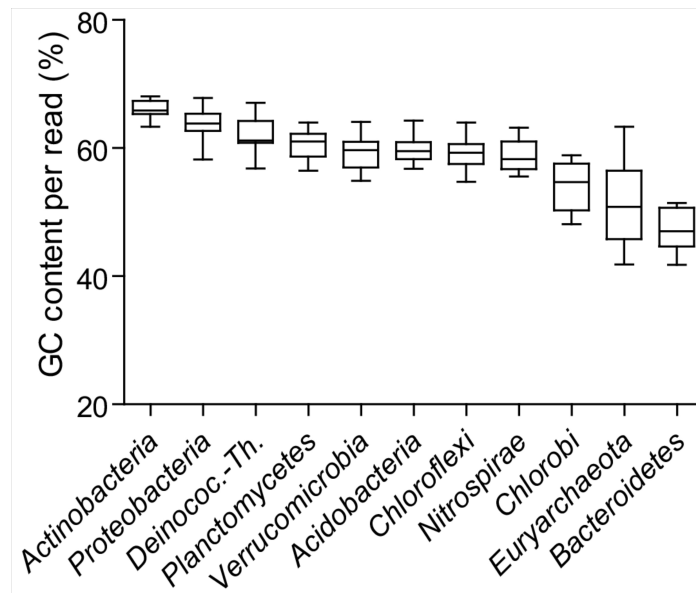

**Figure S2.** The GC-content was calculated for the reads belonging to the 11 highly-represented phyla and sorted by a decreasing median.

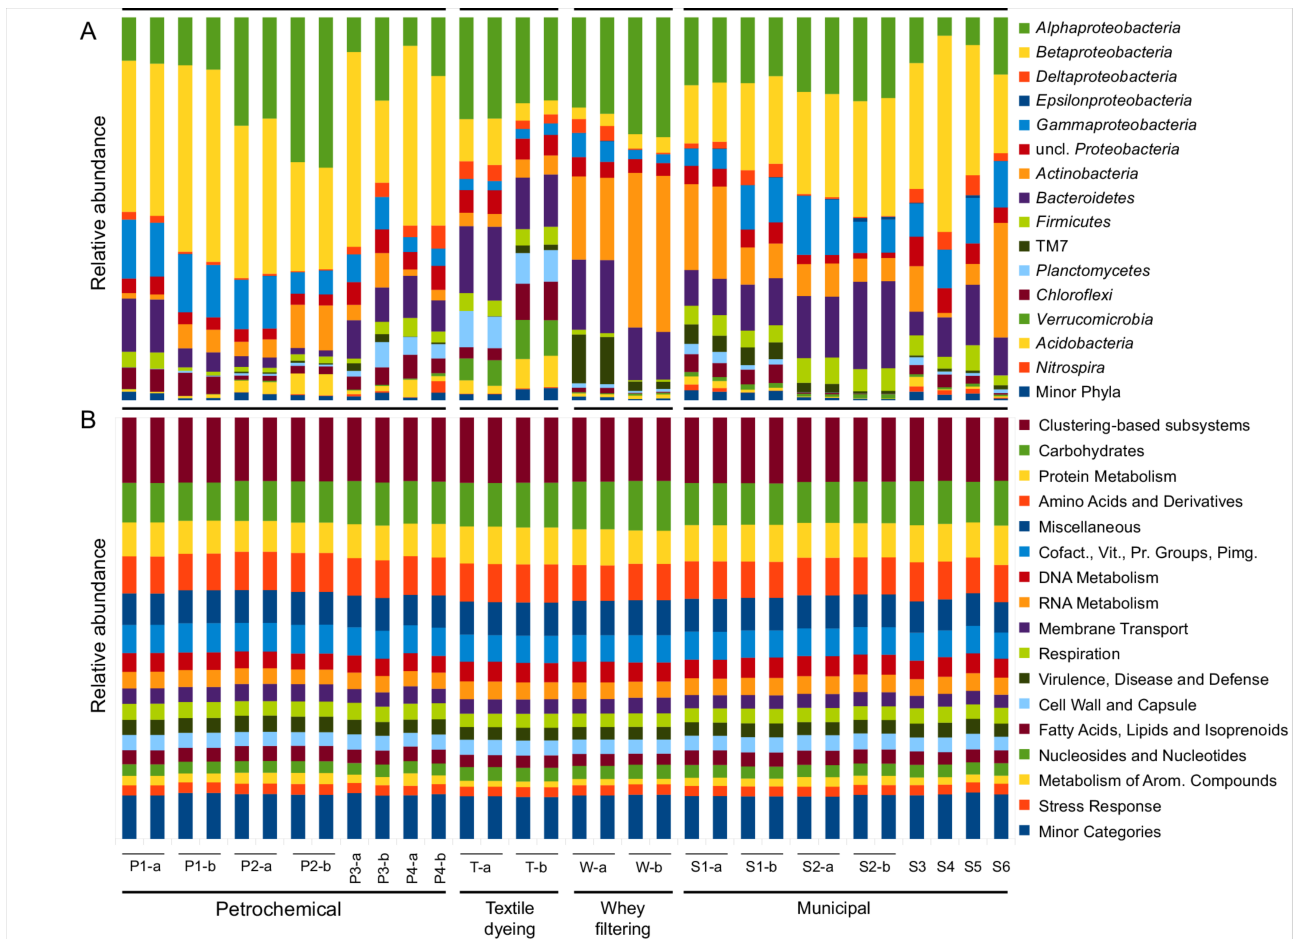

**Figure S3.** Variation of taxonomic and functional profiles across samples, analyzed using bacterial phyla (with *Proteobacteria* divided in classes) and SEED subsystems (level 1), respectively.

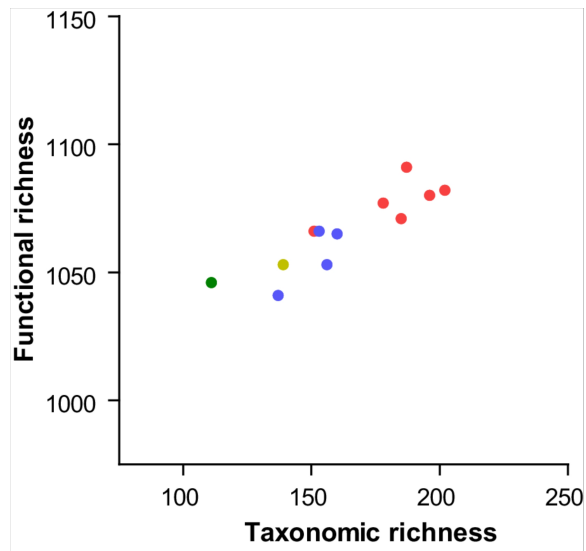

**Figure S4.** Relationship between the observed functional and taxonomic richness of 12 independent WWTP communities. Functional diversity is represented by the number of SEED subsystems (level 3). Taxonomic diversity was estimated from reads corresponding to 16S rRNA gene fragments classified into genera. Technical replicates and data from the two different sampling times were averaged for each WWTP.

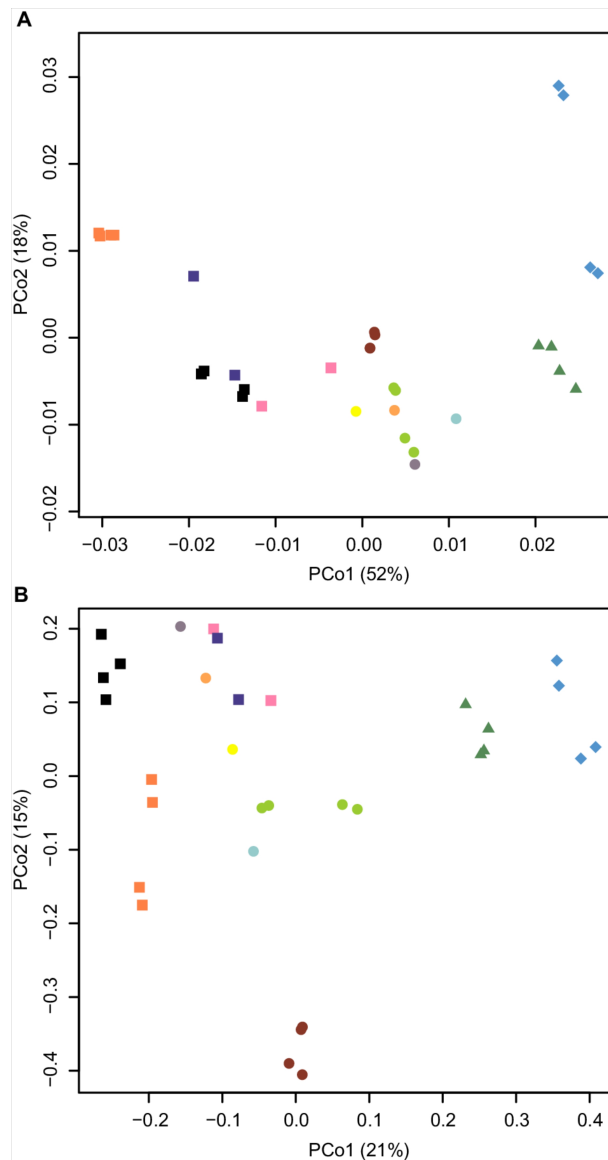

**Figure S5.** Principal Coordinates Analysis based on Bray-Curtis dissimilarity matrix performed for (A) SEED subsystems at level 1 and (B) bacterial genera identified from 16S rRNA shotgun fragments in municipal WWTP (circles), petrochemical WWTP (squares), textile dyeing WWTP (triangles) and whey processing WWTP (diamonds). Colors differentiate WWTPs. Technical replicates and data from the two different sampling times were included separately.

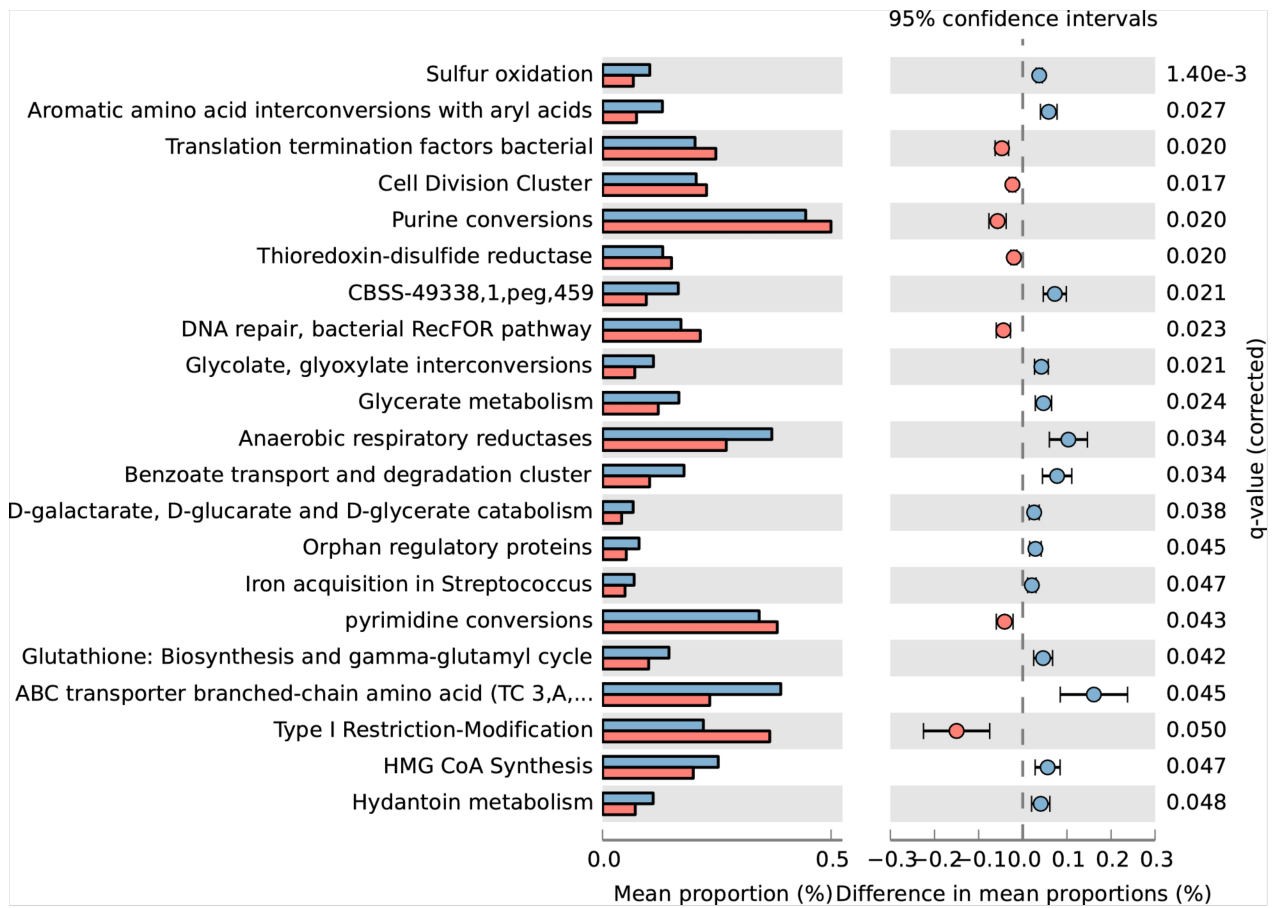

**Figure S6.** Functional traits comparison between the metagenomes of petrochemical (blue bars,  $n = 4$ ) and municipal (red bars,  $n = 6$ ) activated sludge at level 3 of the SEED hierarchy. Technical replicates and data from the two different sampling times were averaged for each WWTP, and only traits with abundance  $> 0.01\%$  were considered. A t-test, with Benjamini-Hochberg FDR multiple test correction, revealed features with significant differences ( $p < 0.05$ , effect size  $> 0.02$ ). Only those traits that showed significant differences are shown.



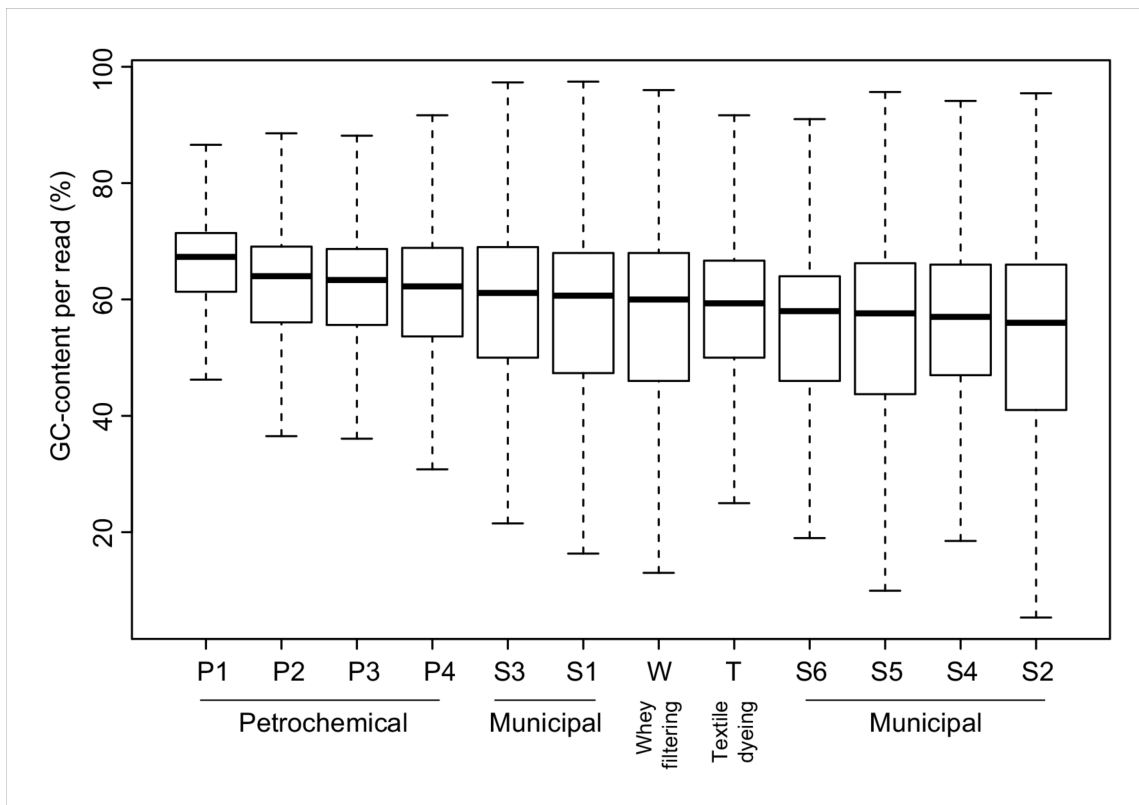

**Figure S7.** The GC-content was calculated for the reads belonging to each WWTP and sorted by a decreasing median.
